# Supplementary material for: Environment-friendly facile synthesis of Pt nanoparticles supported on polydopamine modified carbon materials
Source: Royal Society of Chemistry journal article supplement (doi:10.1039/c3ta00527e), 2013-01-01
Supplement: c3ta00527e.pdf [file c3ta00527e.pdf]

## Environment-friendly facile synthesis of Pt nanoparticles supported on polydopamine modified carbon materials

Xiao-Chen Liu, Guo-Chong Wang, Ru-Ping Liang,\* Ling Shi, Jian-Ding Qiu\*

Department of Chemistry, Nanchang University, Nanchang 330031, P. R. China

E-mail: rpliang@ncu.edu.cn (R.P. Liang); jdqiu@ncu.edu.cn (J.D. Qiu); Tel: +86-791-83969518

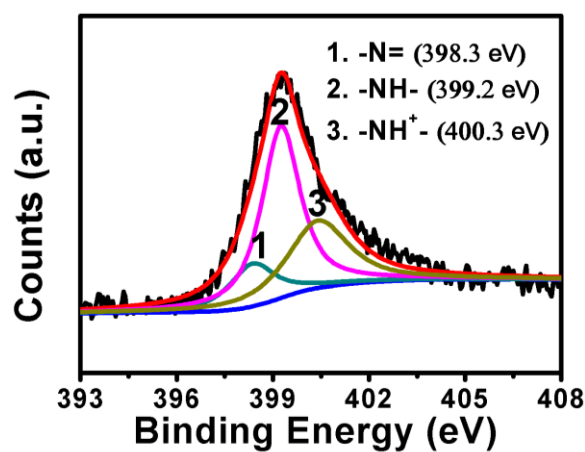

**Figure S1.** The N1s region XPS spectra of monomer Pdop.

Figure S1 shows the N1s region XPS spectra of monomer Pdop. The presence high resolution N 1s of Pdop monomer can be deduced from three additional peak components at the BE of 398.3 eV for the -N=H species, 399.2 eV for the -N-H species and 400.3 eV for the partially protonated -N-H species (-N<sup>+</sup>-).<sup>1</sup> The -N-H species attribute to the amine group of the dopamine, while the -N=H species may form through structure evolution during the dopamine self-polymerization process.<sup>2,3</sup> However, the physicochemical details of dopamine-surface interaction and the mechanism for dopamine self-polymerization remain elusive.

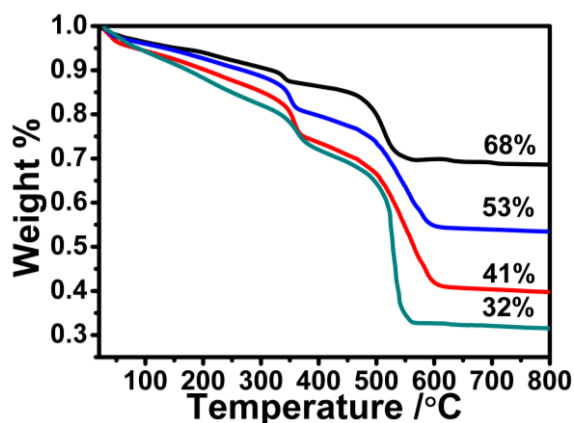

**Figure S2.** Thermogravimetric analysis at a heating rate of  $10\text{ }^{\circ}\text{C min}^{-1}$  under air atmosphere of the MWNTs/Pdop-Pt nanocomposites synthesized from 1:3, 1:4, 1:6 and 1:8 mass ratio of MWNTs/Pdop to  $\text{H}_2\text{PtCl}_6$ , respectively.

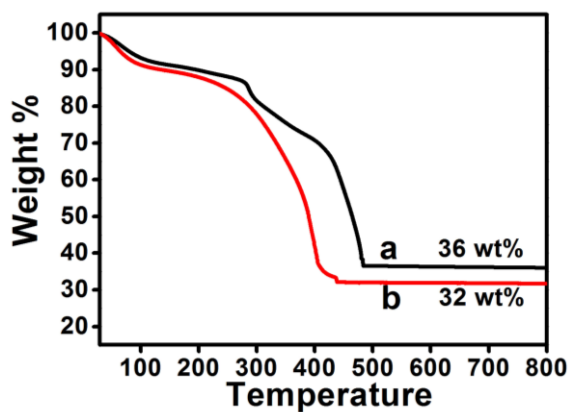

**Figure S3.** Thermogravimetric analysis at a heating rate of  $10\text{ }^{\circ}\text{C min}^{-1}$  under air atmosphere of a) CNs/Pdop-Pt, b) CB/Pdop-Pt nanocomposites.

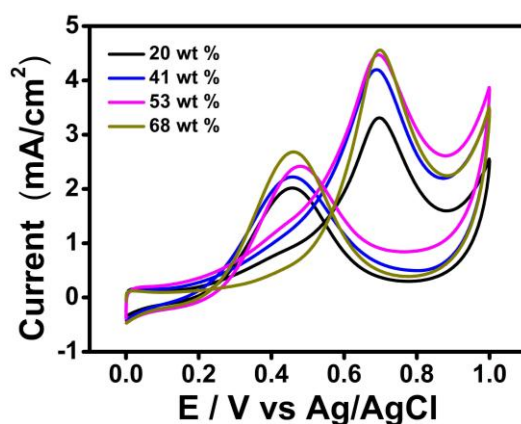

**Figure S4.** Cyclic voltammograms for methanol oxidation of the different mass ratios of MWNTs/Pdop to  $\text{H}_2\text{PtCl}_6$  (20, 41, 53, 68 wt%) catalysts recorded at room temperature in 1.0 M  $\text{H}_2\text{SO}_4$  solution containing 2.0 M methanol at a scan rate of 50 mV/s.

The electrocatalytic properties of Pt/MWNT nanocomposites toward the methanol oxidation reaction were tested. To investigate the electrocatalytic activity of the MWNTs/Pdop-Pt nanocomposites with different Pt loading, room-temperature CVs for methanol oxidation reaction were carried out in 1.0 M H<sub>2</sub>SO<sub>4</sub> solution containing 2.0 M methanol at a scan rate of 50 mV/s (Figure S4). The electrocatalytic activity is expected to increase with increasing Pt loading. Decreasing the loading of Pt NPs would reduce the catalytic surface coverage and the effective contact between Pt NPs and supporting materials. With the increased loading of Pt NPs leads to the significant increase the number of adjacent Pt NPs for subsequent adsorption of Pt-CO<sub>ad</sub> and Pt-OH<sub>ad</sub> and thus promotes the oxidation rate of absorbed CO on Pt surface. Thus, the increased loading of Pt NPs enhanced the electrocatalytic activity for the methanol oxidation. Finally the electrocatalytic activity reaching its limits attributed to the part agglomeration of Pt NPs at higher Pt loadings.<sup>4, 5</sup>

## Notes and references

- 1 W. Ye, D. Wang, H. Zhang, F. Zhou and W. Liu, *Electrochim. Acta*, 2010, **55**, 2004-2009.
- 2 H. Lee, S. M. Dellatore, W. M. Miller and P. B. Messersmith, *Science*, 2007, **318**, 426-430.
- 3 Y. Liao, B. Cao, W.-C. Wang, L. Zhang, D. Wu and R. Jin, *Appl. Surf. Sci.*, 2009, **255**, 8207-8212.
- 4 S. Wang, S. P. Jiang, T. J. White, J. Guo and X. Wang, *J. Phys. Chem.C*, 2009, **113**, 18935-18945.
- 5 J.-D. Qiu, G.-C. Wang, R.-P. Liang, X.-H. Xia and H.-W. Yu, *J. Phys. Chem.C*, 2011, **115**, 15639-15645
